# Supplementary material for: The dynamics of multilevel administration. Coordination processes between national, supra- and international administrations in energy policy
Source: Springer Nature journal article supplement (doi:10.1007/s41358-022-00321-7), 2022-04-26
Supplement: MOESM1 [file 41358_2022_321_MOESM1_ESM.pdf]

**The dynamics of multilevel administration. Coordination processes between national, supra- and international administrations in energy policy**

*Andreas Corcaci (e-mail: andreas.corcaci@gmail.com)*

**Appendix (interview questions)**

*A. Long version*

1. Please describe the different reasons and types of your interaction and coordination with the staff of national administrations (esp. Canada, France, Germany, the UK) / international organizations (esp. the IEA and DG Ener, but also IRENA and the WEC).
  - a) How many people are involved, and who in particular?
  - b) Where and how often do these interactions take place, and are they formal or informal?
  - c) How do the processes of interaction and coordination function in detail?
  - d) Do other processes of interaction exist, and if so, which?
2. Please describe how these reasons and types of interaction and coordination have evolved and changed over time.
  - a) What is different about the (formal and informal) interactions and processes of coordination, and how have they been institutionalized, if at all?
  - b) Have new reasons and types of activities been introduced and if so, which and when?
  - c) Have existing activities been changed or modified at some point and if so, which and when?
3. Please describe how this evolution and change was put into practice.
  - a) Were new reasons or types of interaction and coordination added to existing ones OR were existing activities replaced by new ones?
  - b) Did you decide to change how to make use of certain types of interactions OR has their effect changed over time without your active involvement?
4. Please describe what, in your estimation, led to the changes of interaction and coordination between international organizations and the staff of national administrations.
  - a) In your estimation, which instances of specific activities were introduced or altered as a direct reaction to events or developments more or less outside of your control?
  - b) In your estimation, which instances of specific activities were introduced or altered based on a more or less voluntary decision within the administration?

*B. Short version*

1. Please describe the different types of interaction between the staff of national administrations (esp. Canada, France, Germany, and the UK) and international organizations (esp. the IEA and the European Commission, but also IRENA and the WEC) in the energy sector.
  - a) How many people are involved, and who in particular?
  - b) Where (calls, e-mails, meetings), how often (regular, ad hoc) and in which context (formal, informal) do these interactions take place?
  - c) Do other processes of interaction exist, and if so, which?
  
2. Please describe how these types of interaction have evolved and changed over time.
  - a) Have new activities been introduced, and if so, which and when?
  - b) Have existing activities been changed or modified at some point, and if so, which and when?
  - c) Were new types of interaction added to existing ones, or were the latter replaced by new ones?
  - d) Have existing interactions been used differently, or has their impact changed otherwise?
  - e) In your estimation, which types of interaction were introduced or altered based on a voluntary decision, and which as a reaction to events or developments beyond the administration's control?
